# Tunable self-cleaving ribozymes for modulating gene expression in eukaryotic systems

Thomas Jacobsen<sup>1</sup>, Gloria Yi<sup>1</sup>, Hadel Al Asafen<sup>1</sup>, Ashley A. Jermusyk<sup>1</sup>, Chase L. Beisel<sup>1,2,3\*</sup>, and Gregory T. Reeves<sup>1\*</sup>

<sup>1</sup>Department of Chemical and Biomolecular Engineering, North Carolina State University, Raleigh, NC 27695

<sup>2</sup>Helmholtz Institute for RNA-based Infection Research (HIRI), Helmholtz-Centre for Infection Research (HZI), 97080 Würzburg, Germany

<sup>3</sup>Medical Faculty, University of Würzburg, 97080 Würzburg, Germany

\*Correspondence to [chase.beisel@helmholtz-hiri.de](mailto:chase.beisel@helmholtz-hiri.de) (C.L.B.) and [gtreeves@ncsu.edu](mailto:gtreeves@ncsu.edu)

(G.T.R.)

1 **ABSTRACT**

2 Advancements in the field of synthetic biology have been possible due to the  
3 development of genetic tools that are able to regulate gene expression. However, the  
4 current toolbox of gene regulatory tools for eukaryotic systems have been outpaced by  
5 those developed for simple, single-celled systems. Here, we engineered a set of gene  
6 regulatory tools by combining self-cleaving ribozymes with various upstream competing  
7 sequences that were designed to disrupt ribozyme self-cleavage. As a proof-of-concept,  
8 we were able to modulate GFP expression in mammalian cells, and then showed the  
9 feasibility of these tools in *Drosophila* embryos. For each system, the fold-reduction of  
10 gene expression was influenced by the location of the self-cleaving ribozyme/upstream  
11 competing sequence (i.e. 5' untranslated region (UTR) vs. 3'UTR) and the competing  
12 sequence used. Together, this work provides a set of genetic tools that can be used to  
13 tune gene expression across various eukaryotic systems.

14

15 **KEYWORDS:** Confocal microscopy, *Drosophila melanogaster*, Gene regulatory tools,  
16 Self-cleaving ribozymes, Synthetic biology

## 17 **INTRODUCTION**

18 Synthetic biology is an interdisciplinary field that relies on biologists, engineers,  
19 mathematicians, and others to create novel biological systems by engineering and  
20 interchanging genetic parts derived from nature (1,2). This has led to advancements of  
21 various fields in medicine, molecular biology, and biotechnology. The ability to construct  
22 and analyze these systems has increased due to the availability of gene regulatory  
23 tools. Previous work has shown that these tools have the ability to regulate different  
24 steps of gene expression, including transcription (3), mRNA processing and stability (4),  
25 translation (5), and protein synthesis/stability (6). This ability has been particularly useful  
26 in the construction of synthetic gene circuits, such as counting devices (7), patterning  
27 devices (8), toggle switches (9), and gene oscillators (10), as well as the production of  
28 novel drugs, therapeutics, and biofuels.

29  
30 While gene regulatory tools have been developed for various model systems, the  
31 development of these tools in eukaryotic systems has been outpaced compared to  
32 those developed in single-celled systems like bacteria and yeast. Initially, the  
33 development of gene regulatory tools in eukaryotic systems had been focused on  
34 transcriptional control (1). The tools to regulate transcription include the use of naturally-  
35 occurring (e.g. LacI, TetR, Gal4) and synthetic (e.g. zinc fingers, transcription activator-  
36 like effectors) transcription factors that have the ability to activate or inhibit gene  
37 expression (11–16). Later, other methods of gene regulation have been developed to  
38 control translation (upstream open reading frames (uORFs), microRNAs, aptamers) and  
39 protein turnover (17–23). More recently, clustered regularly interspaced short

40 palindromic repeats (CRISPR) nucleases have been repurposed to act as synthetic  
41 transcription factors that have the ability to target virtually any gene of interest (24,25).  
42 Even with these tools available, more powerful tools are needed to precisely control  
43 gene expression within eukaryotic systems.

44

45 One promising gene regulatory tool that has the potential to fine-tune gene expression  
46 are self-cleaving ribozymes, which are natural RNA structures that are able to catalyze  
47 their own cleavage (26). When inserted into a transcript, these ribozymes reduce  
48 protein levels through self-cleavage and subsequent RNA degradation (**Figure 1**).  
49 Previous work has shown that inserting ribozymes in various loci of an mRNA transcript  
50 disrupts mRNA stability within bacteria, yeast, and mammalian cells (4,27,28). Previous  
51 work in bacteria has also shown that the insertion of sequences flanking a ribozyme and  
52 ribosome binding site can alter the ribozyme's cleavage activity (29). Here, we used  
53 Mfold to engineer a set of genetic tools based on self-cleaving ribozymes that can be  
54 used to regulate gene expression in eukaryotic systems. By combining ribozymes with  
55 upstream competing sequences that have the potential to base-pair with a major stem  
56 of the ribozyme and prevent ribozyme self-cleavage (**Figure 1B**), we show that gene  
57 expression can be tuned in two model systems. We initially show that these tools can  
58 tune expression of a fluorescent reporter in HEK293T cells, and then we implemented  
59 the ribozyme constructs in *Drosophila* embryos. While we observed that these tools  
60 were able to modulate gene expression in two model systems, there was a lack of  
61 correlation between RNA secondary structure prediction algorithms and the  
62 experimental data. Together, these results show that self-cleaving ribozymes combined

63 with upstream competing sequences can modulate gene expression in eukaryotic  
64 systems, and that other factors, besides ribozyme self-cleavage and base-pair  
65 interactions, influence gene expression.

66

67 **Figure 1:** Gene regulatory tools based on self-cleaving ribozymes. **(A)** Inserting self-  
68 cleaving ribozymes in the 3' untranslated region (UTR) of a gene leads to cleavage (red  
69 arrow) and subsequent mRNA transcript destabilization/decay and inhibition of protein  
70 synthesis. **(B)** Conceptual design of tunable self-cleaving ribozymes. A competing  
71 sequence (blue) is placed directly upstream of the ribozyme (orange). Base-pairing of  
72 the competing sequence with a part of the ribozyme stem prevents ribozyme self-  
73 cleavage. The ribozyme is flanked by insulating sequences (gray) to aid in preventing  
74 base-pairing interactions between the ribozyme and other sequences in the 3'UTR. **(C)**  
75 Schematic of the constructs used to test the ribozyme constructs in mammalian cells  
76 and *Drosophila*. We placed the ribozyme (orange) either in the 5'UTR or 3'UTR of the  
77 reporter genes used (green). **(D)** List of the competing sequences used in this study,  
78 along with their labels used in **Figures 2 and 3**. Also listed are the free energy  
79 differences between the minimal free energy structures of ribozymes in a cleavable and  
80 non-cleavable conformation for each competing sequence derived Mfold and Sfold.  
81 Note that R0 indicates a self-cleaving ribozyme lacking competing sequence.

82

## 83 **MATERIALS AND METHODS**

84 **Strains, plasmids, oligonucleotides, and fly lines.** All strains, plasmids, oligos,  
85 gBlocks, and fly lines used in this work can be found in **Supplementary Document 1**.

86 All PCR amplifications were performed using Q5 Hot Start High-Fidelity 2X Master Mix  
87 (NEB, Cat: M0494S) unless specified. All fly lines were generated using site-specific  
88 PhiC31-mediated insertion from Genetivision.

89

90 We used the pcDNA3.1<sup>(+)</sup> mammalian expression vector (Thermo Fisher, Cat: V79020)  
91 for expression of GFP in HEK293T cells. For this study we used the hammerhead self-  
92 cleaving ribozyme from *Schistosoma mansoni* as it has been associated with high  
93 catalytic activity *in vitro* and *in vivo* (29,30). We first built the active ribozyme constructs  
94 by first PCR amplifying GFP and inserting it into the NotI and PstI sites of pCB1180.  
95 The inactive ribozyme constructs were built by creating a single point mutation that  
96 abolishes catalytic activity of the ribozyme (31). Then, annealed and phosphorylated  
97 oligos containing the inactive and active ribozymes were inserted into the XhoI and NotI  
98 sites, located in the 5' untranslated region (UTR), to make pCB1134/1135. To insert  
99 these ribozyme-GFP sequences into pcDNA3.1<sup>(+)</sup>, we PCR amplified the ribozyme-GFP  
100 sequence from pCB1134/1135 and inserted it into the HindIII and XbaI restriction sites  
101 in pcDNA3.1<sup>(+)</sup> to create pCB1136/1137. The upstream competing sequences were  
102 inserted into pCB1136/1137 by linearizing the plasmids with EcoRI and XhoI and then  
103 ligating with annealed and phosphorylated oligos containing the competing sequences  
104 of interest (**Figure 1D**). For insertion of the ribozyme/upstream competing sequences in  
105 the 3'UTR of GFP, the ribozyme/upstream competing sequences were PCR amplified  
106 from the previously built 5'UTR constructs and inserted into the XbaI site of pCB1133.

107

108 We used the pUAST-attB *Drosophila* expression vector (Drosophila Genomics

109 Resource Center, Cat: 1419) for creating the transgenic fly lines containing the *lacZ*  
110 reporter. To generate the ribozyme constructs, we first removed the UAS-hsp70  
111 sequence using the HindIII and KpnI restriction sites and added the hunchback (*hb*)  
112 proximal enhancer (*hbpe*), the *eve* minimal promoter, and the *lacZ* reporter to create  
113 pCB1181. Expressing *lacZ* from the *hbpe* creates a well-established domain of *hb* to  
114 easily study the effects from the self-cleaving ribozymes (32–34). For the insertion of  
115 the self-cleaving ribozymes into the 5'UTR and 3'UTR of *lacZ*, the *Stu*I and KpnI  
116 restriction sites of pCB1181 were used, respectively. To insert the upstream competing  
117 sequences, both the *Eco*RI and *Avr*II sites were added upstream of the ribozyme  
118 sequence for ligation with annealed and phosphorylated oligos containing the competing  
119 sequences of interest.

120

121 **Predicting secondary structures of self-cleaving ribozymes/upstream competing**  
122 **sequences.** The online tools Mfold and Sfold were used to predict the minimal free  
123 energy (MFE) structures of the ribozymes lacking or containing an upstream competing  
124 sequence using the default settings (35,36). We extracted the  $\Delta G$  of the structures  
125 associated with the lowest free energy of a ribozyme in a cleavable and non-cleavable  
126 conformation. The  $\Delta G$  of each upstream competing sequence was calculated as the  
127 difference between the  $\Delta G$  of the cleaved and non-cleaved structures. See  
128 **Supplementary Figure 1** for a representative secondary structure of ribozymes in a  
129 cleaving or non-cleaving conformation.

130

131 **Transient transfections of pcDNA3.1<sup>(+)</sup>-ribozyme constructs.** Transfection-grade

132 DNA was prepared using the QIAGEN Plasmid Mini Kit (QIAGEN, Cat: 12125). One day  
133 prior to the transient transfections, HEK239T cells were seeded onto either 35mm or 24-  
134 well plates with complete media (Dulbecco's Modified Eagle Medium (Invitrogen, Cat:  
135 11965-092) supplemented with 10% fetal bovine serum (Invitrogen, Cat: A3840001)).  
136 Each pcDNA3.1<sup>(+)</sup>-ribozyme construct was transiently transfected using FuGeneHD  
137 (Promega, Cat: E2311). Cells were then incubated for 48 hours prior to preparing the  
138 cells for flow cytometry. See **Supplementary Table 1** for details of the transient  
139 transfections performed using each plate format.

140

141 **Flow cytometry analysis of transiently transfected HEK293T cells.** We trypsinized  
142 the transiently transfected HEK293T cells using trypsin-EDTA (Thermo Fisher, Cat:  
143 25200056) and resuspended them in 500mL 1xPBS (Fisher Scientific, Cat:  
144 MT21040CV). The cells were analyzed for fluorescence using the Accuri C6 Flow  
145 Cytometer with CFlow plate sampler (Becton Dickinson). The events were gated based  
146 on the forward scatter and side scatter, with fluorescence measured in FL2-H, using the  
147 533/30 filter, from at least 10,000 gated events. The fold-reduction of GFP was  
148 calculated as the ratio of the fluorescence values for the cells transfected with an  
149 inactive ribozyme with a specific competing sequence over that of an active ribozyme  
150 with the same competing sequence.

151

152 **Fluorescent *in situ* hybridization (FISH) of *Drosophila* embryos.** All embryos were  
153 aged to 2-4 hours from laying and then fixed using 37% formaldehyde following  
154 standard protocols (37). FISH was combined with fluorescent immunostaining following



155 standard protocols (37). Briefly, fixed embryos were washed in 1xPBS buffer  
156 supplemented with 0.05% Tween-20, and then hybridized with a fluorescein (ftc)-  
157 conjugated anti-sense *lacZ* probe at 55°C. The embryos were washed and incubated  
158 with the rabbit anti-histone (Abcam, Cat: ab1791) (1:10,000 dilution) and goat anti-ftc  
159 (Rockland, Cat: 600-101-096) (1:5,000 dilution) primary antibodies overnight at 4°C.  
160 Embryos were then washed and incubated for 1.5 hours with fluorescent donkey anti-  
161 rabbit-546 (Invitrogen, Cat: A10040) (1:500 dilution) and donkey anti-goat-647  
162 (Invitrogen, Cat: A21447) (1:500 dilution) secondary antibodies at room temperature.  
163 Finally, the embryos were washed and stored in 70% glycerol at -20°C prior to being  
164 imaged. All prepared embryos were imaged within two weeks of protocol completion.

165

166 **Imaging and image analyses of *Drosophila* embryos.** To reduce variability from the  
167 fluorescence measurements, the intensity output of the 488 nM laser was used for laser  
168 calibration prior to embryo imaging (38). The calibration was performed by measuring  
169 the intensity of the 488 nM laser through the transmitted light channel giving us the  
170 output strength of the laser. This allowed us to compensate for potential variability of  
171 laser strength between imaging sessions. The prepared embryos were mounted  
172 laterally using 70% glycerol using two pieces of double-sided tape. A Zeiss LSM 710  
173 microscope was used to acquire 15-25 z-slices 45-60 µm apart at 40x magnification.

174

175 Using Fiji, the z-max intensity projection for each embryo was measured for its  
176 fluorescence intensity. The *hb* expression domain was used as the cutoff for signal, as  
177 the expression profile of *lacZ* should match the endogenous *hb* expression pattern due

178 to expression from its enhancer (hbpe). The fluorescent signal was obtained by  
179 measuring the intensity from the anterior pole to the edge of *hb* domain using the tools  
180 available in Fiji. After measuring signal, background noise was measured as the  
181 intensity outside of the *hb* expression pattern. The fold-reduction of *lacZ* was calculated  
182 as the ratio of the fluorescence values for the embryos with an inactive ribozyme with a  
183 specific competing sequence over that of an active ribozyme with the same competing  
184 sequence. Refer to **Supplementary Document 2** for an in-depth protocol.

185  
186 Using the same embryos, the width of the *lacZ* gradient was compared with the active  
187 and inactive ribozyme constructs. For this analysis, we used a supervised MATLAB  
188 script to first locate and orient the embryo, and then shape the embryos' periphery  
189 boundary. We then measured the fluorescence of the embryo across the anterior-  
190 posterior axis (see supplementary material for MATLAB scripts). To measure the  
191 distance from the anterior pole to the boundary of the *lacZ* domain, we selected three  
192 points along the y-axis and extracted the width corresponding to 50% loss of the  
193 maximum intensity. We selected three different y-values to account for asymmetrical  
194 *lacZ* gradients (**Supplementary Figure 3**). The median of the three values was used to  
195 represent the measurement of the *lacZ* gradient.

196

## 197 **RESULTS**

198 **Designing self-cleaving ribozymes containing tunable upstream competing**  
199 **sequences.** For this study, we used the hammerhead self-cleaving ribozyme as it has  
200 shown high activity *in vitro* and *in vivo* (29,30). Though these ribozyme constructs can

201 be placed in various locations within a transcript, we chose to test two specific locations:  
202 the 5' and 3'UTR of the reporter genes tested (**Figure 1C**). The competing sequences  
203 were placed upstream of the ribozyme to ensure that transcription of the ribozyme  
204 before the competing sequence did not result in self-cleavage prior to the transcription  
205 of the competing sequence. Insulating sequences were flanked upstream of the  
206 ribozyme/competing sequence to limit ribozyme misfolding due to flanking sequences  
207 (**Figure 1B**). Finally, we designed the competing sequences using Mfold (35) to obtain a  
208 set of sequences that were associated with varying levels of predicted folded and  
209 misfolded ribozyme structures (**Figure 1D**). Each competing sequence varied in  
210 sequence length and composition and were associated with different propensities to  
211 base-pair with the stem of the ribozyme. Finally, each competing sequence lacked a  
212 start codon to prevent premature translation initiation.

213

214 **Self-cleaving ribozymes combined with upstream competing sequences can**  
215 **modulate gene expression in mammalian cells.** We first sought to test these  
216 ribozyme constructs in a mammalian system. To this end, we tested the ribozyme  
217 constructs in HEK293T cells. We inserted the self-cleaving ribozymes and 10 different  
218 upstream competing sequences in the 5' UTR or the 3'UTR of GFP to observe how  
219 various sequence configurations impacted reporter gene expression (**Figure 2**). For  
220 each ribozyme/competing sequence tested, we used an inactive ribozyme with the  
221 same competing sequence to act as a control. As the inactive and active ribozymes only  
222 differ by a single point mutation (31), the overall structure of the ribozyme was  
223 preserved. After transiently transfecting these reporter constructs, the fluorescence of

224 the cells was analyzed by flow cytometry analysis. We found that these ribozyme  
225 constructs were able to reduce expression of GFP in HEK293T cells, with fluorescence  
226 generally being associated in a bimodal distribution (untransfected cells and cells  
227 associated with varying GFP levels) (**Supplementary Figure 2**). When located in the  
228 5'UTR, the ribozymes/upstream competing sequences generally resulted in greater  
229 range of fold-reduction levels compared to when located in the 3'UTR (**Figure 2A**).

230

231 **Figure 2:** Self-cleaving ribozymes can tune gene expression in mammalian cells. **(A)**  
232 The average fold-reduction of GFP observed from the flow cytometry analysis for  
233 various competing sequences used in the 3'UTR (yellow) and 5'UTR (blue). The  
234 constructs were transiently transfected and incubated for 48 hours at 37°C. After  
235 incubation, the cells were trypsinized and resuspended in 1xPBS for flow cytometry  
236 analysis. **(B)** Comparison of the fold-change of GFP expression when a competing  
237 sequence is inserted in the 3'UTR (yellow) or 5'UTR (blue) of the transcript. A value of  
238 one indicates no change. **(C)** Normalized average of GFP fold-reduction using the data  
239 from **Figures 2A/B**. This represents the loss of reporter gene expression only due to  
240 ribozyme activity. All error bars represent the standard deviation from at least three  
241 independent transfections. Note that R0 indicates a self-cleaving ribozyme lacking  
242 competing sequence. **(D)** Predicted relationship between the fold-reduction of GFP and  
243 the free energy difference between cleavable and non-cleavable ribozyme  
244 conformations. Plots in column one and two compare the fold-reduction levels with the  
245 free energies calculated from Mfold and Sfold, respectively. The first and second rows  
246 represent the fold-reduction data (**Figure 2A**) and the normalized fold-reduction data

247 **(Figure 2C)**, respectively.

248

249 As the GFP fold-reduction levels between the 5' and 3'UTR constructs were variable,  
250 we wanted to assess the effect of competing sequence insertion on GFP expression.  
251 Due to prior work showing that the formation of secondary structures strongly effects  
252 transcript stability (39), we compared the fluorescence of the cells transiently  
253 transfected with ribozyme constructs containing an inactive ribozyme lacking an  
254 upstream competing sequence to that of inactive ribozymes containing an upstream  
255 competing sequence (**Figure 2B**). While the loss of GFP expression was fairly  
256 consistent for the constructs containing ribozymes with competing sequences in the  
257 3'UTR (~20-40% loss of GFP expression), GFP expression loss was more noticeable  
258 when the ribozyme/competing sequences were placed in the 5'UTR. When placed in  
259 the 5'UTR, the loss of gene expression ranged from negligible loss (e.g. R2, R6) to  
260 ~70% loss (e.g. R8) (**Figure 2B**). Interestingly, the insertion of some upstream  
261 competing sequences resulted in increased expression of GFP (e.g. R3, R4). We then  
262 accounted for the loss of gene expression due to the insertion of a competing sequence  
263 by normalizing the fold-reduction data from **Figure 2A** using the data from **Figure 2B**  
264 (**Figure 2C**). While this generally resulted in less fold-reduction of each construct, a  
265 wide dynamic range was generally maintained, from almost no fold-reduction to ~25-  
266 fold-reduction of GFP.

267

268 After obtaining the experimental data, we then sought to gain insight into the  
269 relationship between the fold-reduction of gene expression and the predicted energies

270 of misfolding. To this end, we compared the GFP fold-reduction levels with the predicted  
271 free energy differences obtained from Mfold. To obtain these values, the difference  
272 between the  $\Delta G$  associated with the MFE structure of a ribozyme in a cleavable  
273 conformation and the  $\Delta G$  associated with the MFE in a non-cleavable conformation was  
274 calculated (**Supplementary Figure 1**). While the experimental data from HEK293T cells  
275 showed a wide dynamic range of fold-reduction levels, there was a lack of correlation  
276 between the experimental data and predicted free energy differences (**Figure 2D**). We  
277 then sought to use a different RNA predictive folding algorithm to see if it could better  
278 correlate the fold-reduction of gene expression to predicted free energies. Thus, we  
279 used Sfold to compare MFE's to the GFP fold-reduction (36). Similar to Mfold, there was  
280 a lack of correlation between the experimental fold-reductions to the predicted free  
281 energies (**Figure 2D**). The lack of a correlation indicates the presence of external  
282 factors that influence ribozyme self-cleavage, thus currently making this approach non-  
283 predictive. Even so, our data show that ribozyme/upstream competing sequences can  
284 be used to tune gene expression in mammalian cells.

285

286 **Self-cleaving ribozymes/upstream competing sequences can modulate gene**  
287 **expression in *Drosophila*.** As a proof-of-concept, we next wanted to test these tools in  
288 a multicellular system. We chose to work with *Drosophila* embryos as we have  
289 previously used this system to study synthetic networks (40). Thus, we generated  
290 transgenic fly lines carrying these ribozyme constructs. We first designed *Drosophila*  
291 expression vectors containing the *lacZ* reporter expressed from the hunchback proximal  
292 enhancer (hbpe). This enhancer results in an expression pattern similar to endogenous

293 *hb*, which has a sharp boundary at roughly 50% anterior-to-posterior (AP) coordinate  
294 (32–34). The *hbpe* drives expression with a boundary at roughly 33% AP coordinate  
295 (**Figure 3A**), which allowed us to quantitatively test these ribozymes *in vivo*. Similar to  
296 the work in HEK293T cells, each ribozyme/upstream competing sequence tested were  
297 compared to an inactive ribozyme containing the same competing sequence to act as a  
298 negative control. Embryos were first hybridized with an antisense *lacZ* probe, then  
299 imaged by confocal microscopy. We found that the insertion of ribozyme/competing  
300 sequences into a transcript expressing *lacZ* were able to tune *lacZ* expression levels in  
301 *Drosophila* embryos (**Figures 3B-E**). Unlike with the mammalian cell data, normalizing  
302 the fold-reduction data by accounting for the effects of inserting the upstream competing  
303 sequences on *lacZ* expression resulted in negligible changes to the measured dynamic  
304 range of fold-reduction values (**Figures 2A-C, 3F-G**). While the fold-reduction values  
305 observed in *Drosophila* were generally less than those observed in HEK293T cells, the  
306 correlation of fold-reduction values, compared to the work in mammalian cells, remained  
307 the same (i.e.  $R_0 > R_1 > R_7$ ) and maintained a high dynamic range (~2-14 fold-  
308 reduction of *lacZ*).

309

310 **Figure 3:** Self-cleaving ribozymes can tune gene expression in *Drosophila* embryos. **(A)**  
311 Depiction of the ribozyme constructs and its expression domain in *Drosophila* embryos.  
312 The domain of *lacZ* is similar to the endogenous *hunchback* (*hb*) gradient due to the  
313 *hunchback* proximal enhancer (*hbpe*). During early development, *hb* is strongly  
314 expressed in the anterior of the embryo. **(B-E)** Representative images of *in situ*  
315 hybridized *Drosophila* embryos probed for *lacZ*. Each embryo imaged expresses *lacZ*

316 under the control of the hbpe and contains an inactive **(B/D)** or active **(C/E)** ribozyme.  
317 Red triangles represent the width of the *lacZ* gradient. **(F)** The average fold-reduction of  
318 *lacZ* observed from the imaging data for various competing sequences. Embryos were  
319 collected from transgenic fly lines constitutively expressing *lacZ* from the hbpe  
320 containing a ribozyme sequence in the 3' UTR (yellow) or 5' UTR (blue) and prepared  
321 for image analysis. Images were acquired using a Zeiss LSM710 confocal microscope.  
322 **(G)** Fold-change of *lacZ* expression due to effects other than ribozyme activity. A value  
323 of 1 indicates no change. **(H)** Normalized average fold-reduction of *lacZ* using the data  
324 from **Figures 3F/G**. This represents the reduction of *lacZ* expression solely due to  
325 ribozyme activity. All error bars represent the standard deviation from at least 10  
326 embryos. Note that R0 indicates a self-cleaving ribozyme lacking an upstream  
327 competing sequence. Also note that fly lines containing the R7 competing sequence in  
328 the 3'UTR were not analyzed. **(I)** The fluorescence intensity at various positions of the  
329 embryo. A domain width of zero indicates the anterior pole and increasing values  
330 indicate a position closer to the posterior. **(J)** The average width of the *lacZ* domain for  
331 each ribozyme and competing sequence listed.

332

333 Using the same images, we then compared the width of the *lacZ* domain along the  
334 anterior-posterior axis. We hypothesized that the embryos containing an active  
335 ribozyme construct would be associated with a reduced domain width as the expression  
336 of *lacZ* would be reduced at locations containing weak fluorescent intensity (i.e. distal to  
337 anterior pole). For each ribozyme construct, we observed that the differences in the *lacZ*  
338 domain width were small, but noticeable across all constructs. Interestingly, only the two



339 strongest ribozymes (i.e. A0-5UTR, A0-3UTR) resulted in a noticeable *lacZ* gradient  
340 reduction (**Figure 3J**), though the average gradient width between active and inactive  
341 ribozymes were not statistically different. These results indicate that the *lacZ* domain  
342 width did not vary between active and inactive ribozymes regardless of location or  
343 competing sequence.

344

## 345 **DISCUSSION**

346 In this work, we engineered a set of genetic tools that were able to modulate gene  
347 expression in HEK293T cells and *Drosophila* embryos. At face value, inserting the  
348 ribozymes in the 5'UTR of the reporter genes yielded a greater range of fold-reduction  
349 levels compared to the 3'UTR. However, we observed that insertion of upstream  
350 competing sequences resulted in the inhibition of gene expression in the absence of  
351 ribozyme self-cleavage. This effect was greater when the ribozyme/competing  
352 sequence was located in the 5'UTR (**Figure 2B**). After normalizing the fold-reduction  
353 levels by accounting for the loss of gene expression, we observed that some ribozyme  
354 constructs (most notably the 5'UTR constructs) reduced gene expression more weakly  
355 compared to that data prior to normalization (**Figures 2A/C**). In general, the  
356 ribozymes/upstream competing sequences were observed to reduce gene expression  
357 more strongly in HEK293T cells compared to *Drosophila* embryos (**Figures 2 and 3**),  
358 which has also been observed in recent work (41). This difference could be due to  
359 different biological machinery between mammalian and insect models, different  
360 experimental assays, or the constructs themselves, as they contain different promoters  
361 and reporter genes. Even with the differences in fold-reduction levels between these

362 model systems, these tools maintained a dynamic range of gene expression regulation  
363 (~1-25 in HEK293T cells and ~2-14 in *Drosophila*). While the experimental data did not  
364 show a high correlation with the RNA secondary structure predictions (**Figure 2D**), we  
365 provide a set of gene regulatory tools based on empirical measurements between  
366 competing sequences and strength of gene reduction.

367

368 Prior to experimental work, we used Mfold (35,36) to design a set of competing  
369 sequences that were associated with a wide range of free energies (**Figure 1D**). When  
370 comparing these predicted free energies to the fold-reduction levels observed in our  
371 experimental data (**Figures 2A/C**), we generally observed a weak correlation (**Figure**  
372 **2D**). This discrepancy could have been due to a variety of factors. For instance, the  
373 insulating sequences, used to prevent interactions between the ribozyme and flanking  
374 sequences, could have affected the ability of the competing sequences to base-pair with  
375 the ribozyme. While Mfold and Sfold predictions showed minimal interactions between  
376 the ribozyme and insulating sequences, the sequences flanking the insulating  
377 sequences could have interacted with the competing sequence, ribozyme, and/or the  
378 insulating sequence. It is also possible that one or more of the competing and/or  
379 insulating sequences contain a target sequence for a native biological factor or  
380 pathway, such as an endogenous transcription factor, internal ribosome entry site  
381 (IRES), or RNAi. While the addition of a specific target sequence is unlikely, novel  
382 transcription factors, IRES', and non-coding RNAs continue to be discovered in  
383 eukaryotic systems, including *Drosophila* (42–48). Finally, Mfold and/or Sfold may lack  
384 the ability to predict the fold-reduction of gene expression associated with the ribozyme

385 constructs. Recent work has shown that hammerhead ribozymes are associated with  
386 varying cleavage activities across different model systems (e.g. mammalian vs. yeast)  
387 and experimental setups (e.g. *in vitro* vs. *in vivo*) (41), which show that cellular context  
388 is likely important for the observed activity. Another possibility is that Mfold and Sfold  
389 are not accurately capturing RNA folding. While algorithms, such as Mfold and Sfold,  
390 have the ability to predict RNA secondary structures, ribozymes can form complex 3D  
391 structures (e.g. pseudoknots) that cannot be predicted accurately. Due to these  
392 reasons, current predictive RNA folding algorithms may not be sufficient for accurate  
393 secondary structure predictions. Improvements on RNA structure prediction models will  
394 allow for a more accurate design of competing sequences.

395

396 Experimental data indicated that insertion of the upstream competing sequences  
397 generally inhibited gene expression when compared with the constructs lacking these  
398 sequences. This phenomenon could be due to various reasons. For one, the mRNA  
399 transcripts could have been subjected to the no-go decay pathway (49). This mRNA  
400 surveillance pathway occurs when ribosomes have stalled during translation, resulting  
401 in cleavage and subsequent degradation. While some of the ribozyme constructs  
402 resulted in drastic reduction of gene expression from competing sequence insertion, the  
403 majority of these constructs had a small, but noticeable effect on gene expression  
404 (**Figure 2B**). Similar to the RNA folding algorithms, another possibility could be that one  
405 or more of the competing sequences was a target sequence for an endogenous  
406 biological factor or pathway. To prevent variation of gene expression when using these  
407 ribozyme constructs, longer insulating sequences can be flanked to both the 5' and 3'

408 ends of the ribozyme/upstream competing sequences. This could prevent interactions  
409 between the ribozyme or competing sequence with flanking sequences, resulting in fold-  
410 reduction levels only from ribozyme self-cleavage.

411

## 412 **CONCLUSIONS**

413 We developed a set of tools that were able to tune gene expression in HEK293T cells  
414 and *Drosophila*. While the free energies obtained from the predictive RNA secondary  
415 structure tool did not correlate well with the experimental data, the competing  
416 sequences used in this work provide a set of genetic tools associated with a wide range  
417 of fold-reduction levels. Though tested in mammalian and insect systems, these tools  
418 should be applicable in other eukaryotic systems, such as *C. elegans*, zebrafish, and  
419 mice. Previous work has shown that self-cleaving ribozymes are found naturally in these  
420 organisms (50–52) and have been used for therapeutic applications (4,53). These tools  
421 will be useful for studies involving synthetic biology, especially for the purposes of  
422 building and studying synthetic gene circuits.

## 423 **ACKNOWLEDGMENTS**

424 The pUAST-attB plasmid was a gift from the Drosophila Genomics Resource Center,  
425 who are funded from the National Institutes of Health (2P40OD010949). This work was  
426 supported by the U.S. Department of Education [Graduate Assistance in Areas of  
427 National Need Biotechnology Fellowship (P200A140020)] and the National Science  
428 Foundation (MCB-1413044).

429

## 430 **AUTHOR CONTRIBUTIONS**

431 AAJ, TJ, CLB, and GTR conceived and planned the experiments. TJ and GY carried out  
432 the molecular cloning. TJ performed the transient transfections and flow cytometry. TJ  
433 and GY carried out the *in situ* hybridizations. HA imaged the embryos. TJ performed the  
434 data analysis. TJ, GTR, and CB wrote the manuscript with input from all authors.

435 **REFERENCES**

- 436 1. Lienert F, Lohmueller JJ, Garg A, Silver PA. Synthetic biology in mammalian cells:  
437 Next generation research tools and therapeutics. *Nat Rev Mol Cell Biol.*  
438 2014;15:95–107.
- 439 2. Singh V. Recent advancements in synthetic biology: Current status and  
440 challenges. *Gene.* 2014;535:1–11.
- 441 3. Guzman L, Belin D, Carson MJ, Beckwith J. Tight regulation, modulation, and  
442 high-level expression by vectors containing the arabinose PBAD promoter. *J*  
443 *Biotechnol.* 1995;177:4121–30.
- 444 4. Yen L, Svendsen J, Lee JS, Gray JT, Magnier M, Baba T, et al. Exogenous  
445 control of mammalian gene expression through modulation of RNA self-cleavage.  
446 *Nature.* 2004;431:471–6.
- 447 5. Salis HM, Mirsky EA, Voigt CA. Automated design of synthetic ribosome binding  
448 sites to control protein expression. *Nat Biotechnol.* 2009;27:946–50.
- 449 6. McGinness KE, Baker TA, Sauer RT. Engineering controllable protein  
450 degradation. *Mol Cell.* 2006;22:701–7.
- 451 7. Friedland AE, Lu TK, Wang X, Shi D, Church G, Collins JJ. Synthetic gene  
452 networks that count. *Science.* 2009;324:1199–202.
- 453 8. Basu S, Gerchman Y, Collins CH, Arnold FH, Weiss R. A synthetic multicellular  
454 system for programmed pattern formation. *Nature.* 2005;434:1130–4.
- 455 9. Gardner TS, Cantor CR, Collins JJ. Construction of a genetic toggle switch in  
456 *Escherichia coli.* *Nature.* 2000;403:339–42.
- 457 10. Elowitz MB, Leibler S. A synthetic oscillatory network of transcriptional regulators.

- 458 Nature. 2000;403:335–338.
- 459 11. Brown M, Figge J, Hansen U, Wright C, Jeang K-T, Khoury G, et al. Lac repressor  
460 can regulate expression from a hybrid SV40 early promoter containing a lac  
461 operator in animal cells. *Cell*. 1987;49:603–12.
- 462 12. Gossen M, Bujard H. Tight control of gene expression in mammalian cells by  
463 tetracycline-responsive promoters. *Proc Natl Acad Sci*. 1992;89:5547–51.
- 464 13. Maeder ML, Thibodeau-Beganny S, Osiak A, Wright DA, Anthony RM, Eichinger  
465 M, et al. Rapid “open-source” engineering of customized zinc-finger nucleases for  
466 highly efficient gene modification. *Mol Cell*. 2008;31:294–301.
- 467 14. Morbitzer R, Römer P, Boch J, Lahaye T. Regulation of selected genome loci  
468 using de novo-engineered transcription activator-like effector (TALE)-type  
469 transcription factors. *Proc Natl Acad Sci*. 2010;107:21617–22.
- 470 15. Garg A, Lohmueller JJ, Silver PA, Armel TZ. Engineering synthetic TAL effectors  
471 with orthogonal target sites. *Nucleic Acids Res*. 2012;40:7584–95.
- 472 16. Kakidani H, Ptashne M. GAL4 activates gene expression in mammalian cells.  
473 *Cell*. 1988;52:161–7.
- 474 17. Medenbach J, Seiler M, Hentze MW. Translational control via protein-regulated  
475 upstream open reading frames. *Cell*. 2011;145:902–13.
- 476 18. Ferreira JP, Overton KW, Wang CL. Tuning gene expression with synthetic  
477 upstream open reading frames. *Proc Natl Acad Sci*. 2013;110:11284–9.
- 478 19. Xie Z, Wroblewska L, Prochazka L, Weiss R, Benenson Y. Multi-input RNAi-  
479 based logic circuit for identification of specific cancer cells. *Science*.  
480 2011;333:1307–11.

- 481 20. Ausländer S, Ausländer D, Müller M, Wieland M, Fussenegger M. Programmable  
482 single-cell mammalian biocomputers. *Nature*. 2012;487:123–7.
- 483 21. Nishimura K, Fukagawa T, Takisawa H, Kakimoto T, Kanemaki M. An auxin-  
484 based degron system for the rapid depletion of proteins in nonplant cells. *Nat*  
485 *Methods*. 2009;6:917–22.
- 486 22. Bongers KM, Chen L, Liu CW, Wandless TJ. Small-molecule displacement of a  
487 cryptic degron causes conditional protein degradation. *Nat Chem Biol*.  
488 2011;7:531–7.
- 489 23. Banaszynski LA, Chen L-C, Maynard-Smith LA, Ooi AGL, Wandless TJ. A rapid,  
490 reversible, and tunable method to regulate protein function in living cells using  
491 synthetic small molecules. *Cell*. 2006;126:995–1004.
- 492 24. Qi LS, Larson MH, Gilbert LA, Doudna JA, Weissman JS, Arkin AP, et al.  
493 Repurposing CRISPR as an RNA-guided platform for sequence-specific control of  
494 gene expression. *Cell*. 2013;152:1173–83.
- 495 25. Gilbert LA, Larson MH, Morsut L, Liu Z, Brar GA, Torres SE, et al. CRISPR-  
496 mediated modular RNA-guided regulation of transcription in eukaryotes. *Cell*.  
497 2013;154:442–51.
- 498 26. Ferré-D'Amaré AR, Scott WG. Small self-cleaving ribozymes. *Cold Spring Harb*  
499 *Perspect Biol*. 2010;2:a003574.
- 500 27. Link KH, Guo L, Ames TD, Yen L, Mulligan RC, Breaker RR. Engineering high-  
501 speed allosteric hammerhead. *Biol Chem*. 2007;388:779–86.
- 502 28. Win MN, Smolke CD. A modular and extensible RNA-based gene-regulatory  
503 platform for engineering cellular function. *Proc Natl Acad Sci*. 2007;104:14283–8.



- 504 29. Carothers JM, Goler J a, Juminaga D, Keasling JD. Model-driven engineering of  
505 RNA devices to quantitatively program gene expression. *Science*.  
506 2011;334:1716–9.
- 507 30. Ferbeyre G, Smith JM, Cedergren R. Schistosome satellite DNA encodes active  
508 hammerhead ribozymes. *Mol Cell Biol*. 1998;18:3880–8.
- 509 31. Seela F, Debelak H, Usman N, Burgin A, Beigelman L. 1-Deazaadenosine:  
510 synthesis and activity of base-modified hammerhead ribozymes. *Nucleic Acids*  
511 *Res*. 1998;26:1010–8.
- 512 32. Driever W, Nüsslein-Volhard C. The bicoid protein is a positive regulator of  
513 hunchback transcription in the early *Drosophila* embryo. *Nature*. 1989;337:138–  
514 43.
- 515 33. Lehmann R, Nüsslein-Volhard C. hunchback, a gene required for segmentation of  
516 an anterior and posterior region of the *Drosophila* embryo. *Dev Biol*.  
517 1987;119:402–17.
- 518 34. Perry MW, Bothma JP, Luu RD, Levine M. Precision of hunchback expression in  
519 the *Drosophila* embryo. *Curr Biol*. 2012;22:2247–52.
- 520 35. Zuker M. Mfold web server for nucleic acid folding and hybridization prediction.  
521 *Nucleic Acids Res*. 2003;31:3406–15.
- 522 36. Ding Y, Chan CY, Lawrence CE. Sfold web server for statistical folding and  
523 rational design of nucleic acids. *Nucleic Acids Res*. 2004;32:135–41.
- 524 37. Kosman D, Mizutani CM, Lemons D, Cox WG, McGinnis W, Bier E. Multiplex  
525 detection of RNA expression in *Drosophila* embryos. *Science*. 2004;305:846.
- 526 38. Liberman LM, Reeves GT, Stathopoulos A. Quantitative imaging of the Dorsal

- 527 nuclear gradient reveals limitations to threshold-dependent patterning in  
528 *Drosophila*. Proc Natl Acad Sci. 2009;106:22317–22322.
- 529 39. Carrier TA, Keasling JD. Controlling messenger RNA stability in bacteria:  
530 Strategies for engineering gene expression. Biotechnol Prog. 1997;13:699–708.
- 531 40. Jermusyk AA, Murphy NP, Reeves GT. Analyzing negative feedback using a  
532 synthetic gene network expressed in the *Drosophila melanogaster* embryo. BMC  
533 Syst Biol. 2016;10:85.
- 534 41. Wurmthaler LA, Klauser B, Hartig JS. Highly motif- and organism-dependent  
535 effects of naturally occurring hammerhead ribozyme sequences on gene  
536 expression. RNA Biol. 2018;15:231–41.
- 537 42. Young RS, Marques AC, Tibbit C, Haerty W, Bassett AR, Liu JL, et al.  
538 Identification and properties of 1,119 candidate LincRNA loci in the *Drosophila*  
539 *melanogaster* genome. Genome Biol Evol. 2012;4:427–42.
- 540 43. Inagaki S, Numata K, Kondo T, Tomita M, Yasuda K, Kanai A, et al. Identification  
541 and expression analysis of putative mRNA-like non-coding RNA in *Drosophila*.  
542 Genes to Cells. 2005;10:1163–73.
- 543 44. Tupy JL, Bailey AM, Dailey G, Evans-Holm M, Siebel CW, Misra S, et al.  
544 Identification of putative noncoding polyadenylated transcripts in *Drosophila*  
545 *melanogaster*. Proc Natl Acad Sci. 2005;102:5495–500.
- 546 45. Marr II MT, D'Alessio JA, Puig O, Tjian R. IRES-mediated functional coupling of  
547 transcription and translation amplifies insulin receptor feedback. Genes Dev.  
548 2007;21:175–83.
- 549 46. Maier D, Nagel AC, Preiss A. Two isoforms of the Notch antagonist Hairless are

- 550 produced by differential translation initiation. Proc Natl Acad Sci. 2002;99:15480–  
551 5.
- 552 47. Rhee DY, Cho D-Y, Zhai B, Slattery M, Ma L, Mintseris J, et al. Transcription  
553 factor networks in *Drosophila melanogaster*. Cell Rep. 2014;8:2031–43.
- 554 48. Wang C, Yeung F, Liu P-C, Attar RM, Geng J, Chung LWK, et al. Identification of  
555 a novel transcription factor, GAGATA-binding protein, involved in androgen-  
556 mediated expression of prostate-specific antigen. J Biol Chem. 2003;278:32423–  
557 30.
- 558 49. Doma MK, Parker R. Endonucleolytic cleavage of eukaryotic mRNAs with stalls in  
559 translation elongation. Nature. 2006;440:561–4.
- 560 50. Webb C-HT, Riccitelli NJ, Ruminiski DJ, Lupták A. Widespread occurrence of self-  
561 cleaving ribozymes. Science. 2009;326:953.
- 562 51. Martick M, Horan LH, Noller HF, Scott WG. A discontinuous hammerhead  
563 ribozyme embedded in a mammalian messenger RNA. Nature. 2008;454:899–  
564 902.
- 565 52. Salehi-Ashtiani K, Szostak JW. In vitro evolution suggests multiple origins for the  
566 hammerhead ribozyme. Nature. 2001;414:82–4.
- 567 53. Peace BE, Florer JB, Witte D, Smicun Y, Toudjarska I, Wu G, et al. Endogenously  
568 expressed multimeric self-cleaving hammerhead ribozymes ablate mutant  
569 collagen *in cellulo*. Mol Ther. 2005;12:128–36.

570 **SUPPORTING INFORMATION LEGEND**

571 **Supplementary Figure 1:** Representative figures depicting secondary structures of  
572 self-cleaving ribozymes. **(A)** Self-cleaving ribozyme that lacks a competing sequence in  
573 a cleavable conformation. **(B)** Self-cleaving ribozyme that contains a competing  
574 sequence in a cleavable conformation. **(C)** Self-cleaving ribozyme that contains a  
575 competing sequence in a non-cleavable conformation. The red text indicates the  
576 insulating sequence, green text indicates the competing sequence, and black text  
577 indicates the ribozyme.

578

579 **Supplementary Figure 2:** Flow cytometry data of transiently transfected HEK293T  
580 cells. **(A)** Representative forward and side scatter plot of HEK293T cells transiently  
581 transfected with ribozyme constructs. The cell population was gated in green. **(B)**  
582 Histograms of transiently transfected HEK293T cells. Plotted are the number of cells at  
583 corresponding fluorescent values of untransfected cells (black), cells containing an  
584 active ribozyme/competing sequence (red), and cells containing an inactive  
585 ribozyme/competing sequence (blue) in the 5'UTR (top row) or 3'UTR (bottom row) of  
586 *gfp*.

587

588 **Supplementary Figure 3:** Representative embryos labeled with *lacZ* gradient width  
589 associated with **(A/B)** symmetric and **(C/D)** asymmetric *lacZ* gradients. Red line  
590 indicates end of *lacZ* gradient. Multiple red lines indicate the width of the *lacZ* gradient  
591 at a particular anterior-posterior axis length.

592

593 **Supplementary Table 1:** Transfection conditions used for 35mm plates and 24-well  
594 plates.

595

596 **Supplementary Document 1:** DNA constructs and fly lines used in this work.

597

598 **Supplementary Document 2:** In-depth protocol for measuring fluorescence intensity of

599 *Drosophila* embryos.

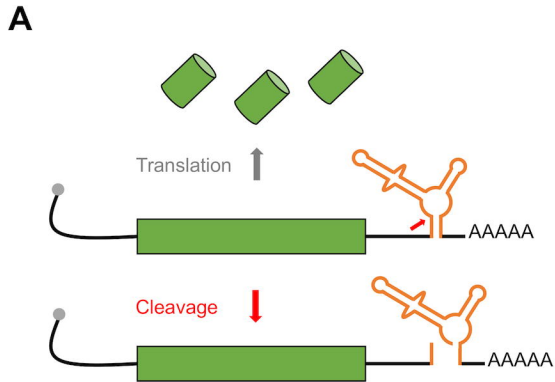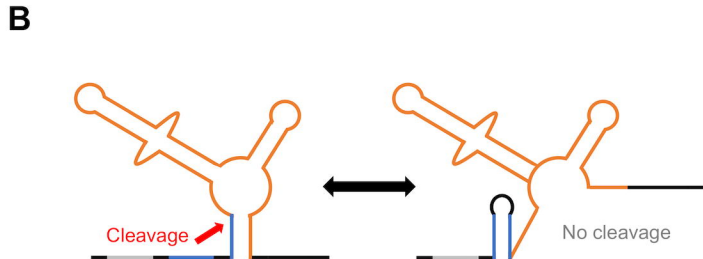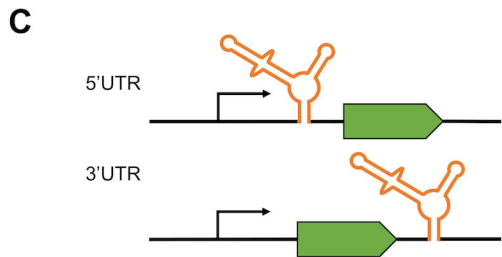

**D**

| Labels | Competing sequences | Mfold: $\Delta G_{MFE}$ | Sfold: $\Delta G_{MFE}$ |
|--------|---------------------|-------------------------|-------------------------|
| R1     | CTGG                | +3.8                    | -2.7                    |
| R2     | GTGGT               | -1.4                    | -1.3                    |
| R3     | GCTGAA              | +5.1                    | -3.6                    |
| R4     | CTCGA               | -0.3                    | -1.2                    |
| R5     | GCTAGAAG            | -0.5                    | -1.3                    |
| R6     | GGAT                | -0.6                    | -1.3                    |
| R7     | CTGGAT              | +1.9                    | -2.3                    |
| R8     | GCTGGAAG            | +2.5                    | -4.2                    |
| R9     | CGGGTT              | -0.1                    | -1.3                    |
| R10    | TTGG                | +3.2                    | +5.2                    |

**A**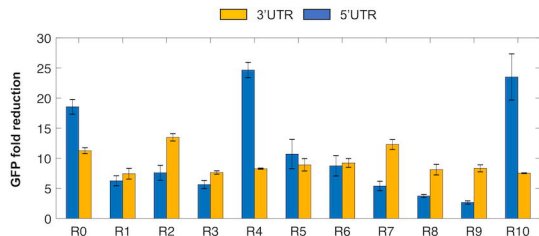**B**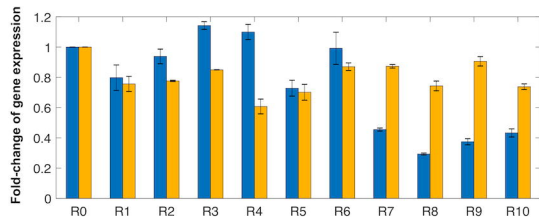**C**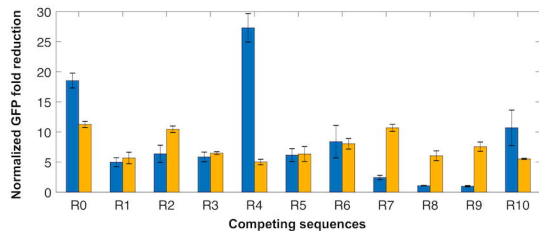**D**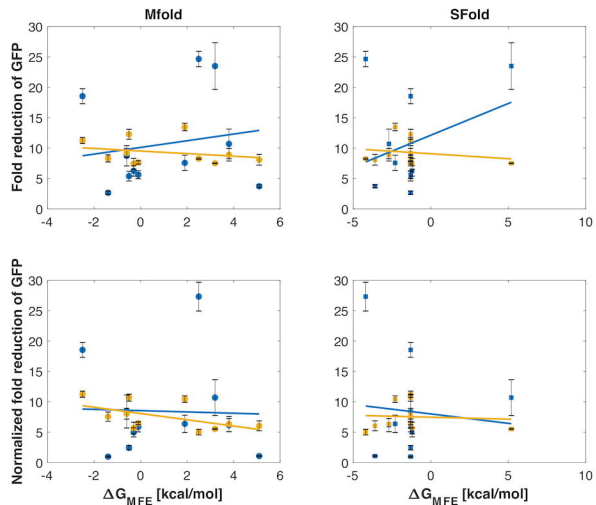

**A**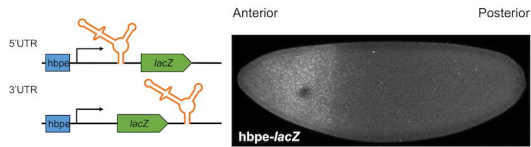**B**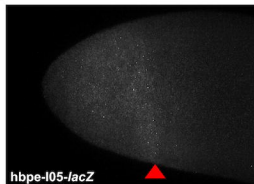**C**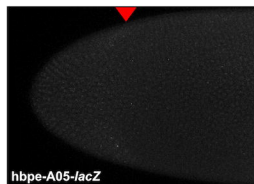**D**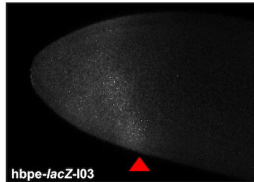**E**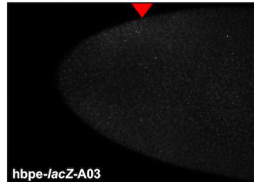**I**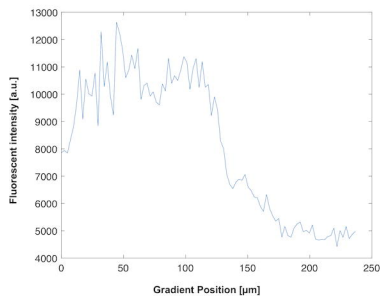**F**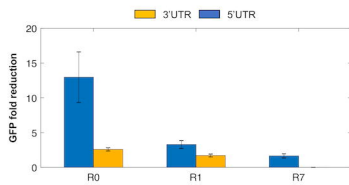**G**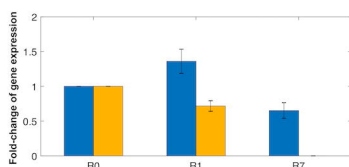**H**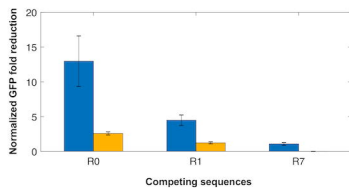**J**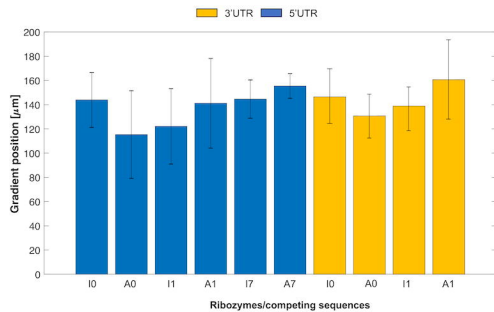

Source: https://www.biorxiv.org/content/10.1101/739326v2.full.pdf
